# Supplementary material for: Tannic acid-polypyrrole multifunctional coating layer enhancing the interface effect and efficient Li-ion transport of a phosphorus anode
Source: Royal Society of Chemistry journal article supplement (doi:10.1039/d1nr07987e), 2022-01-01
Supplement: d1nr07987e1.pdf [file d1nr07987e1.pdf]

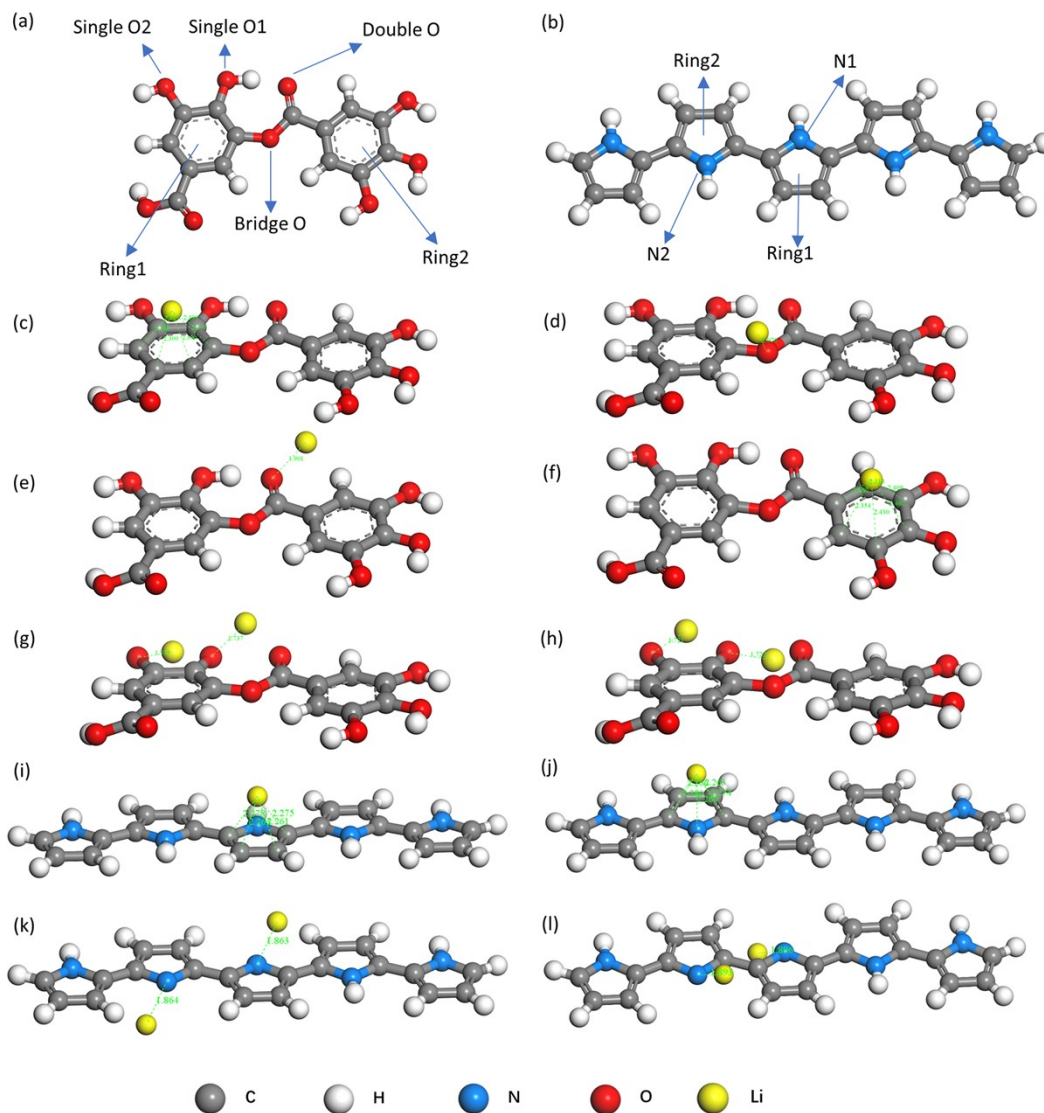

Fig. S1 Schematic diagram of various positions on (a) TA and (b) PPy. The (c) initial and (d) final positions of Li-ion diffusing from ring1 to bridge O above TA. The (e) initial and (f) final positions of Li-ion diffusing from double O to ring2 above TA. The (g) initial and (h) final positions of Li-ion diffusing from single O1 to single O2 above TA. The (i) initial and (j) final positions of Li-ion diffusing from ring1 to ring2 above PPy. The (k) initial and (l) final positions of Li-ion diffusing from N1 to N2 above PPy.

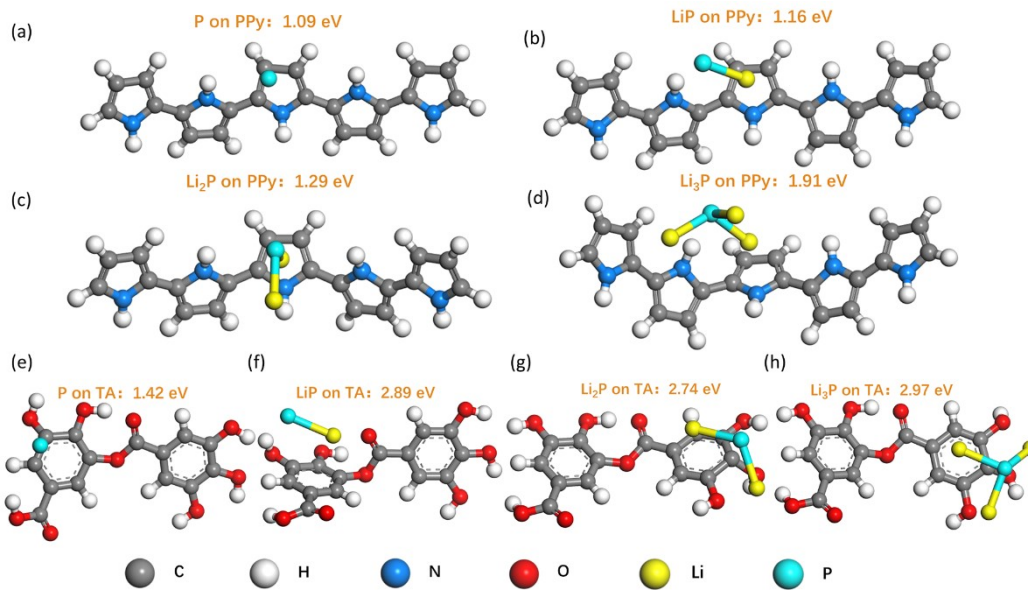

Fig. S2 Adsorption of (a) P, (b) LiP, (c) Li<sub>2</sub>P, and (d) Li<sub>3</sub>P on PPy.<sup>1</sup> Adsorption of (e) P, (f) LiP, (g) Li<sub>2</sub>P, and (h) Li<sub>3</sub>P on TA.

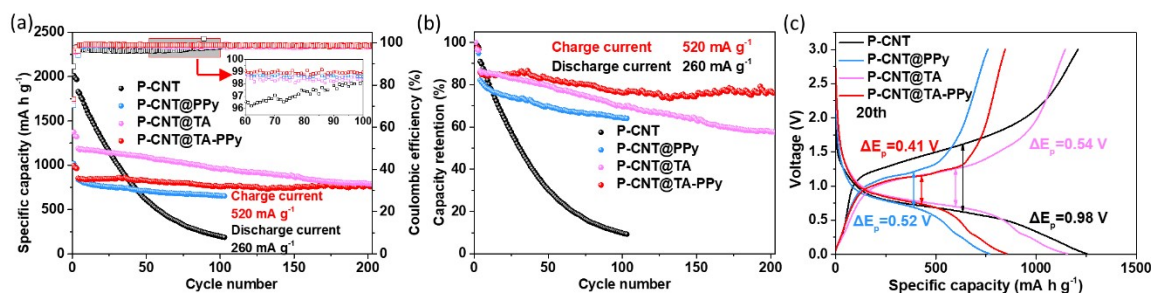

Fig. S3 (a) Cycling performances, (b) capacity retention and (c) the 20th galvanostatic charge/discharge curves of P-CNT, P-CNT@PPy, P-CNT@TA, P-CNT@TA-PPy at 520 mA g<sup>-1</sup> charge current density and 260 mA g<sup>-1</sup> discharge current density.

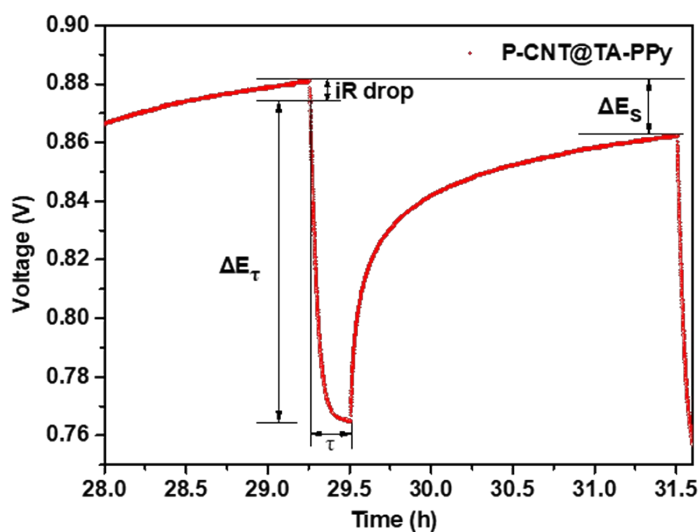

Fig. S4 Schematic labeling of different parameters in GITT.

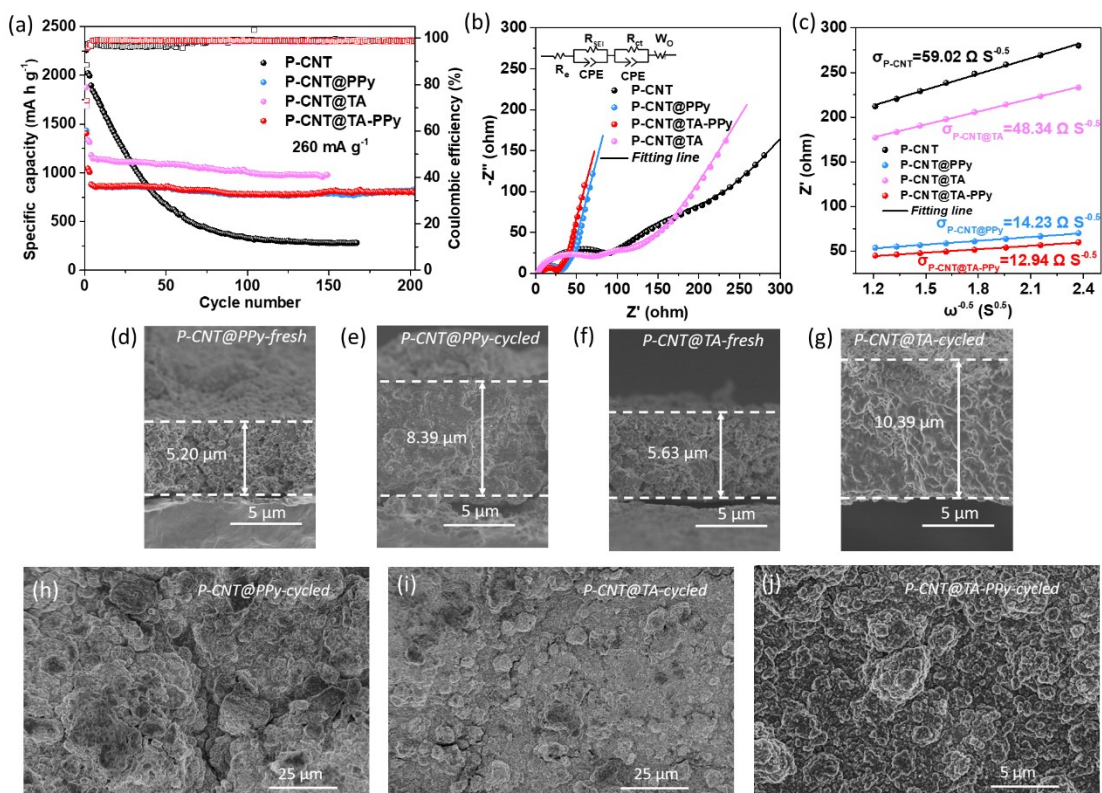

Fig. S5 The dates were tested at both charge and discharge current of 260 mA g<sup>-1</sup>. (a) Long cycle curves of discharge capacity of P-CNT, P-CNT@PPy, P-CNT@TA, P-CNT@TA-PPy. (b) Nyquist plots of P-CNT, P-CNT@PPy, P-CNT@TA, P-CNT@TA-PPy after 25 cycles and (c) corresponding fitting lines between frequency and  $Z'$  in the low frequency region. SEM images showing the thickness and morphology of (d) (e) (h) P-CNT@PPy, (f) (g) (i) P-CNT@TA and (j) P-CNT@TA-PPy electrodes before and after 25 cycles.

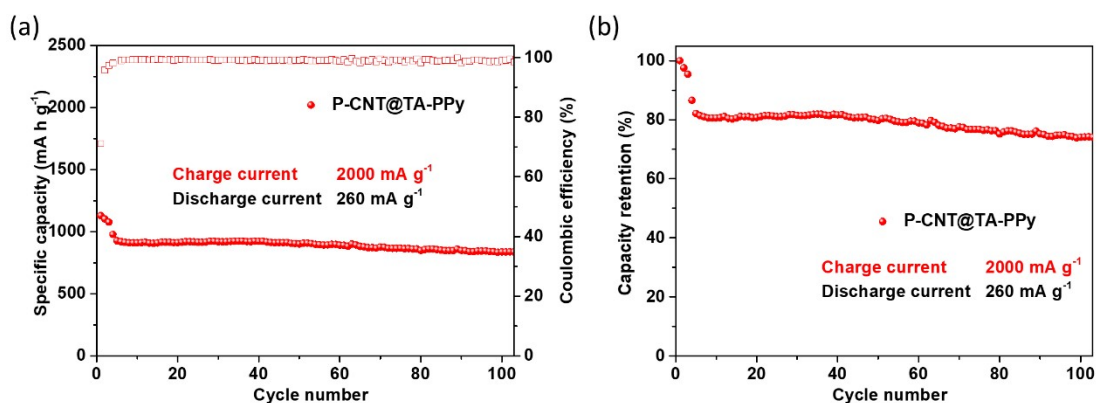

Fig. S6 (a) The cycling performance and (b) corresponding charge capacity retention of P-CNT@TA-PPy at a charge current density of 2000 mA g<sup>-1</sup> and discharge current density of 260 mA g<sup>-1</sup>.

Table S1 Cycling performance and multi-rate performance of this work and other works.

| Materials                   | Phosphorus species | Cycling performance                                                                                                                                                                                                          | Multi-rate performance                                                                                   | Reference |
|-----------------------------|--------------------|------------------------------------------------------------------------------------------------------------------------------------------------------------------------------------------------------------------------------|----------------------------------------------------------------------------------------------------------|-----------|
| P-CNT@TA-PPy                | Black phosphorus   | 815 mA h g <sup>-1</sup> at 260 mA g <sup>-1</sup> ;<br>757 mA h g <sup>-1</sup> at 520 mA g <sup>-1</sup> ;<br>821 mA h g <sup>-1</sup> at 1000 mA g <sup>-1</sup> ;<br>837 mA h g <sup>-1</sup> at 2000 mA g <sup>-1</sup> | 893, 840, 760, 446 mA h g <sup>-1</sup> at 260, 520, 1300, 5200 mA g <sup>-1</sup>                       | This work |
| P/CNT-10% LiF               | Black phosphorus   | 821 mA h g <sup>-1</sup> at 50 mA g <sup>-1</sup> ;<br>783 mA h g <sup>-1</sup> at 200 mA g <sup>-1</sup> ;                                                                                                                  | 1060, 945, 866, 798, 754 and 703 mA h g <sup>-1</sup> at 25, 50, 100, 200, 500 1000 mA g <sup>-1</sup>   | [S2]      |
| BP/HPC                      | Black phosphorus   | 350 mA h g <sup>-1</sup> at 1000 mA g <sup>-1</sup> ;                                                                                                                                                                        | 580, 450, 360, 300, 210 mA h g <sup>-1</sup> at 50, 200, 500, 1000, 2000 mA g <sup>-1</sup>              | [S3]      |
| BP@CNTs                     | Black phosphorus   | 750 mA h g <sup>-1</sup> at 100 mA g <sup>-1</sup> ;<br>522 mA h g <sup>-1</sup> at 500 mA g <sup>-1</sup> ;                                                                                                                 | 1450, 950, 800, 550, 420, 380 mA h g <sup>-1</sup> at 100, 250, 500, 1000, 1500, 2500 mA g <sup>-1</sup> | [S4]      |
| RP-HC(70%)@TiO <sub>2</sub> | Red phosphorus     | 795 mA h g <sup>-1</sup> at 100 mA g <sup>-1</sup> ;<br>447 mA h g <sup>-1</sup> at 1000 mA g <sup>-1</sup> ;                                                                                                                | 841, 716, 657, 608, 554, 518, 460 mA h g <sup>-1</sup> at 100, 200, 400, 600, 800,                       | [S5]      |

|                                                                         |                       |                                                                                                                   |                                                                                                                            |       |
|-------------------------------------------------------------------------|-----------------------|-------------------------------------------------------------------------------------------------------------------|----------------------------------------------------------------------------------------------------------------------------|-------|
|                                                                         |                       |                                                                                                                   | 1000 2000 mA g <sup>-1</sup>                                                                                               |       |
| BP                                                                      | Black phosphorus      | 440 mA h g <sup>-1</sup> at<br>740 mA g <sup>-1</sup> ;                                                           | 636, 566, 540, 504,<br>470, 407 mA h g <sup>-1</sup><br>at<br>460, 1440, 1830,<br>2750, 3430, 4120<br>mA h g <sup>-1</sup> | [S6]  |
| Red phosphorus<br>nanodot/Ti <sub>3</sub> C <sub>2</sub> T <sub>x</sub> | Red phosphorus        | 500 mA h g <sup>-1</sup> at 50<br>mA g <sup>-1</sup> ;<br>818 mA h g <sup>-1</sup> at<br>200 mA g <sup>-1</sup> ; | 599, 434, 347, 260,<br>197 mA h g <sup>-1</sup> at<br>50, 100, 200, 500,<br>1000 mA g <sup>-1</sup>                        | [S7]  |
| BPNs@TiO <sub>2</sub> @G                                                | Black phosphorus      | 502 mA h g <sup>-1</sup> at<br>1250 mA g <sup>-1</sup> ;                                                          | 491, 425, 383, 329<br>mA h g <sup>-1</sup> at 300,<br>500, 1000, 2000<br>mA g <sup>-1</sup>                                | [S8]  |
| FP                                                                      | Fibrous<br>phosphorus | 817 mA h g <sup>-1</sup> at<br>100 mA g <sup>-1</sup> ;                                                           | 1302, 940, 509,<br>262, 150 mA h g <sup>-1</sup><br>at 100, 200, 500,<br>1000, 2000 mA g <sup>-1</sup>                     | [S9]  |
| TGC-<br>SiC@graphene@<br>P                                              | Fibrous<br>phosphorus | 553 mA h g <sup>-1</sup> at<br>200 mA g <sup>-1</sup> ;                                                           | 734, 572, 453, 346<br>mA h g <sup>-1</sup> at 100,<br>200, 500, and 1000<br>mA g <sup>-1</sup>                             | [S10] |

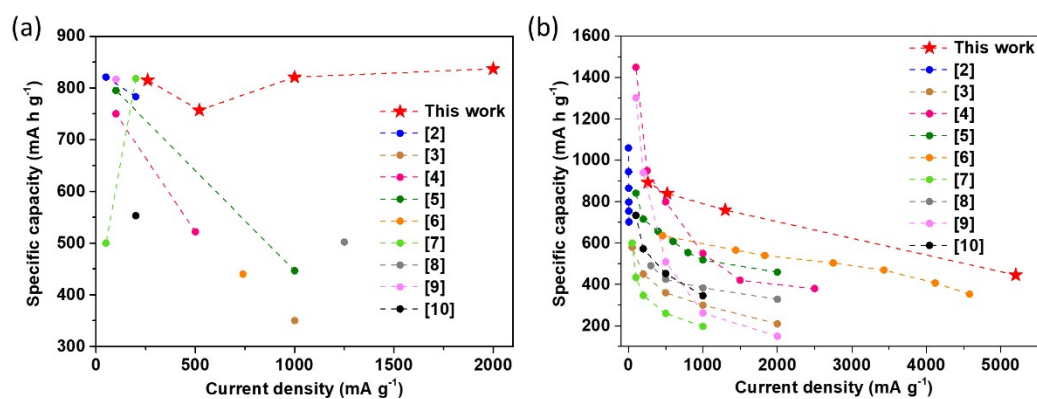

Fig. S7 (a) The cycling performance and (b) multi-rate performance compared with other works.<sup>2-</sup>

10

## Reference

- 1 J. Sun, C. Liu, H. Wang, Y. Cao, X. Han, S. Zhang, H. Wang, Y. Zhang, A. Chen, Z. Yang, and J. Sun. *ACS Applied Energy Materials*, 2021, **4**, 4112–4118.

- 2 C. Liu, M. Han, Y. Cao, L. Chen, W. Ren, G. Zhou, A. Chen, and J. Sun. *Energy Storage Materials*, 2021, **37**, 417–423.
- 3 S. Zhou, J. Li, L. Fu, J. Zhu, W. Yang, D. Li, and L. Zhou. *ChemElectroChem*, 2020, **7**, 2184–2189.
- 4 Y. Zhang, L. Wang, H. Xu, J. Cao, D. Chen, and W. Han. *Advanced Functional Materials*, 2020, **30**, 1909372–1909383.
- 5 D. Wei, Y. Wu, Y. Nie, J. Duan, C. Cao, J. Wu, L. Li, Z. Chen, G. Zhang, and H. Duan. *Applied Surface Science*, 2020, **529**, 147114.
- 6 Y. Wang, M. He, S. Ma, C. Yang, M. Yu, G. Yin, and P. Zuo. *The journal of physical chemistry letters*, 2020, **11**, 2708–2716.
- 7 S. Zhang, X. Y. Li, W. Yang, H. Tian, Z. Han, H. Ying, G. Wang, and W. Q. Han. *ACS Applied Materials & Interfaces*, 2019, **11**, 42086–42093.
- 8 J. Mei, Y. Zhang, T. Liao, X. Peng, G. A. Ayoko, and Z. Sun. *Energy Storage Materials*, 2019, **19**, 424–431.
- 9 Z. Chen, Y. Zhu, Q. Wang, W. Liu, Y. Cui, X. Tao, and D. Zhang. *Electrochimica Acta*, 2019, **295**, 230–236.
- 10 D. Zhao, B. Li, J. Zhang, X. Li, D. Xiao, C. Fu, L. Zhang, Z. Li, J. Li, D. Cao, and C. Niu. *Nano Letters*, 2017, **17**, 3376–3382.
